# Supplementary material
Source: Springer Nature journal article supplement (https://www.springermedizin.de/resource/supplementary/12875_2010_560_MOESM2_ESM.pdf/9434956)

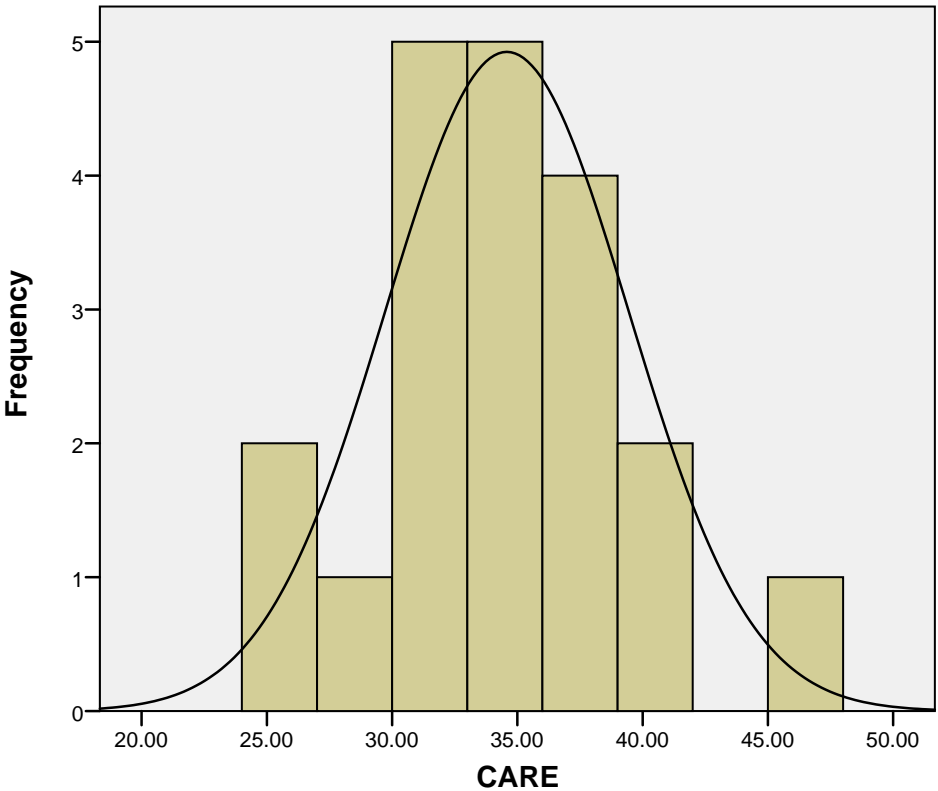

Mean =34.58  
Std. Dev. =4.861  
N =20

Supplement: MOESM2 [file 9434956]
